# Supplementary material
Source: publisher site journal article supplement (https://www.dovepress.com/article/407974)
Supplement: Supplementary file 1 [file get_supplementary_file.php]

**Supplementary Table**

**Supplementary Table 1: The sizes of investigated study sites and their cooperating medical services**

|  | Hospital size (n) | Size of affiliated medical services (n) |
| --- | --- | --- |
| Class 3 hospitals | 35 |  |
| Class 2 hospitals | 8 | 31 |
| Class 1 hospitals |  | 6 |
| Community service center |  | 3 |
| Total | 43 | 40 |

**Supplementary Figures**


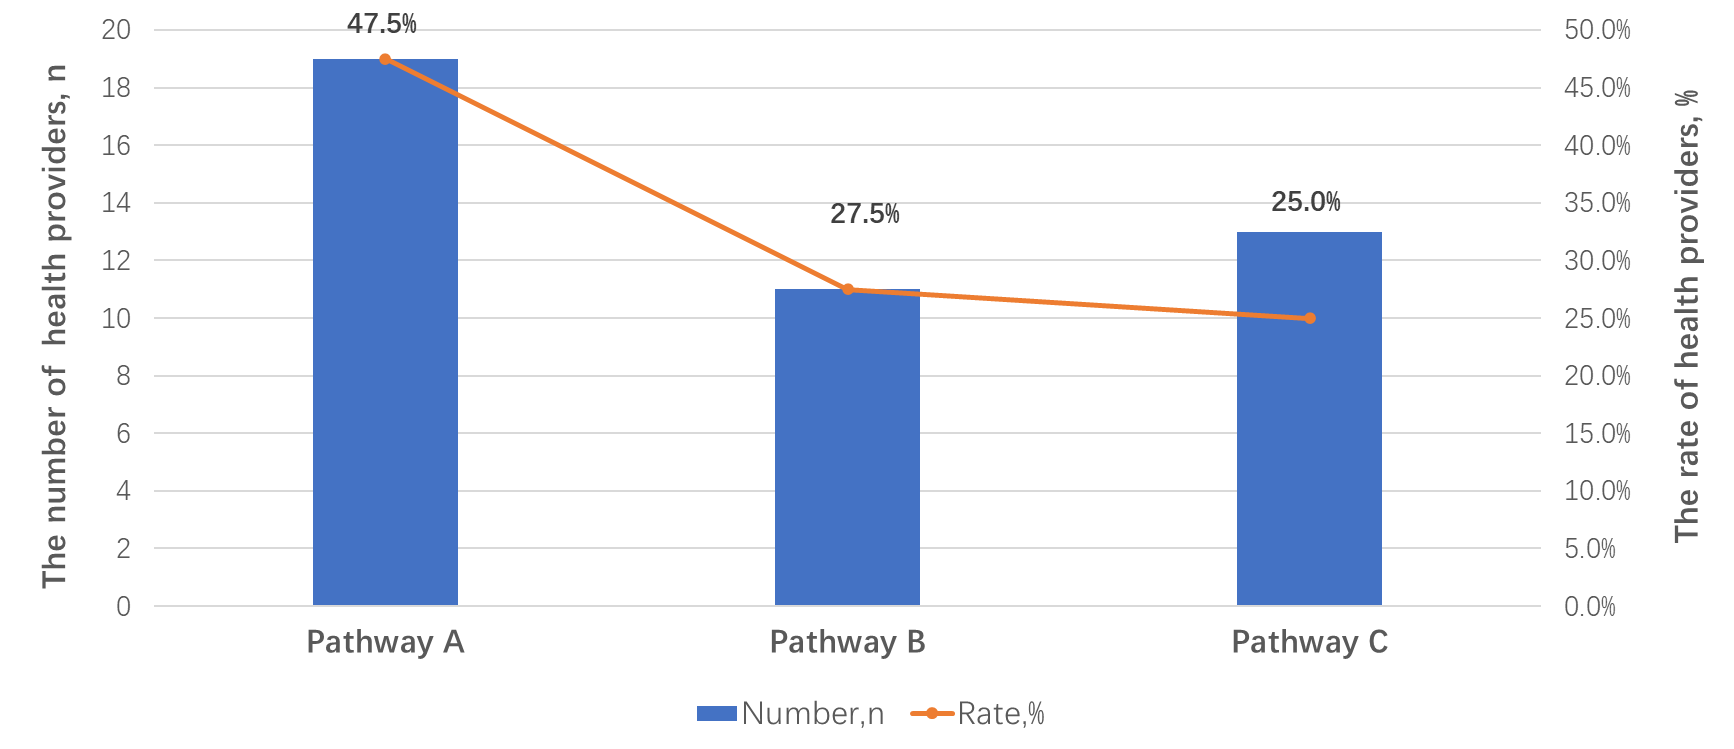


**Supplementary Figure 1:The clinical pathway focused by doctors**

**
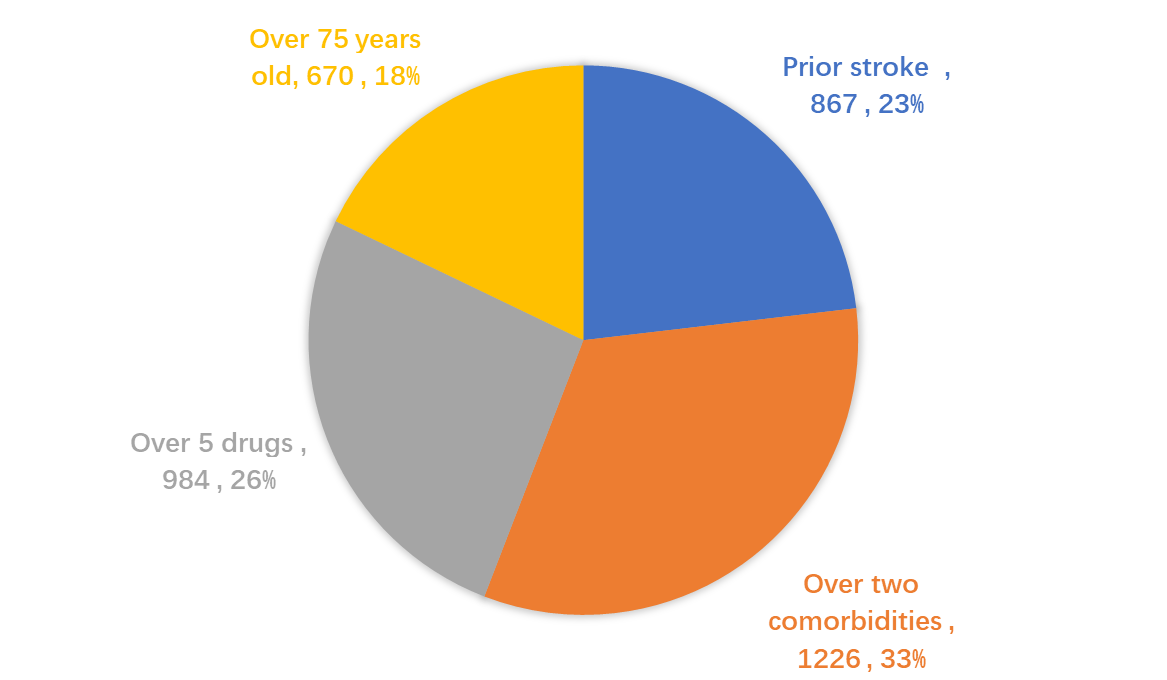
**

**Supplementary Figure 2: The distribution of ‘high-risk’ AF patients among investigated hospitals**

**Supplementary Material 1**

**Academic Steering Committee**

**Gregory Y H Lip**, MD, Liverpool Centre for Cardiovascular Science, University of Liverpool and Liverpool Heart & Chest Hospital, Liverpool, United Kingdom (Co-Chair)

**Yutao Guo**, MD, PhD, Department of Pulmonary vessel and Thrombotic Disease, Chinese PLA General Hospital, Beijing, China (Co-Chair)

**Tatjana Potpara**, MD, PhD, School of Medicine, Belgrade University; Clinical Centre of Serbia, Belgrade, Serbia

**Jun Zhu**, MD, PhD, Fuwai Hospital, Beijing, China

**Jiefu Yang,** MD, PhD, Heart Center, Beijing Hospital, Beijing, China

**Yundai Chen**, PhD, Department of Cardiology, Chinese PLA General Hospital, Beijing, China

**Liming Wang**, MD, PhD, The National Center for Chronic and Noncommunicable Disease Control and Prevention, Chinese Center for Disease Control and Prevention, Beijing, China

**Yihong Sun,** MD, PhD, China-Japan Friendship Hospital, Beijing, China

**Kehui Dong**, MD, PhD, Center of Neurology, Beijing Tiantan Hospital, Capital Medical University, Beijing, China

**Zhenyu Liu**, MD, PhD, Peking Union Medical College Hospital, Beijing, China

**Jianguo Liu**, MD, PhD, Department of Neurology, Chinese PLA General Hospital, Beijing, China

**Tong Liu**, MD, PhD, Tianjin Key Laboratory of Ionic-Molecular Function of Cardiovascular Disease, Tianjin Institute of Cardiology, Second Hospital of Tianjin Medical University, Tianjin, China

**Supplementary Material 2**

**Data Management Committee**

**Yuan Yao**, MD, PhD, Institution for Management on Hospital, Chinese PLA General Hospital, Beijing, China

**Yi Zhang**, MD, Institutional Ethics Committee, The Sixth Medical Center of PLA General Hospital, Beijing, China

**Miao Liu**, MD, PhD, Department of Statistics and Epidemiology, Graduate school of Chinese PLA General Hospital, Beijing, China

**Dandi Chen**, MD, PhD, Department of Health Management, West China School of Public Health,Sichuan, China
